# Supplementary material for: Evaluating a novel dimensional reduction approach for mechanical fractionation of cells using a tandem flexible micro spring array (tFMSA)
Source: Royal Society of Chemistry journal article supplement (doi:10.1039/c6lc01527a), 2017-01-01
Supplement: c6lc01527a1.pdf [file c6lc01527a1.pdf]

## Supplemental Information

### Viable Cell Capture by tFMSA

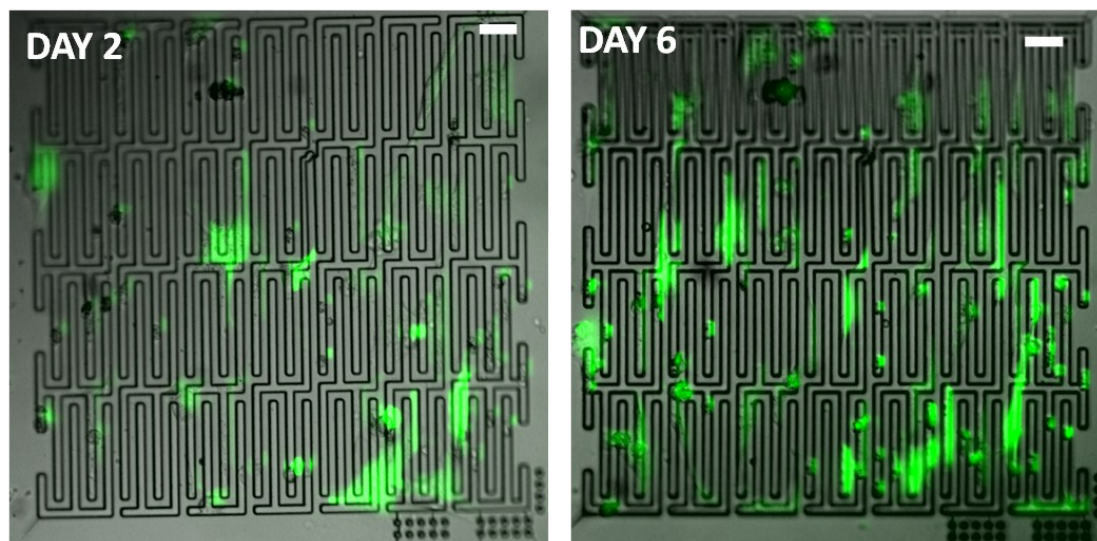

**Supplemental Fig. 1:** On-chip culture of captured GFP-labeled C8161 cells for 6 days. Images show overlay of Differential Interference Contrast (DIC) and fluorescence with pseudocolor added. Scale bars are 30  $\mu\text{m}$ .

### MDA-MB-231 Cell Size Distribution Overlay

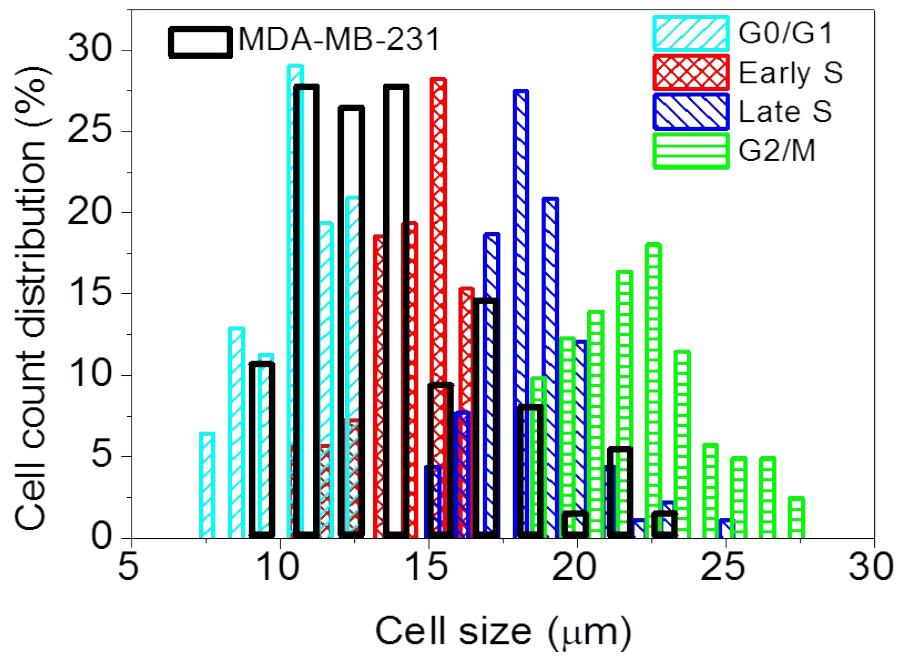

**Supplemental Fig. 2:** Measured size distribution of MDA-MB-231 cells by cell cycle stage with overlaid size distribution of a mixed population of MDA-MB-231.

### MDA-MB-231 PSC Overlay

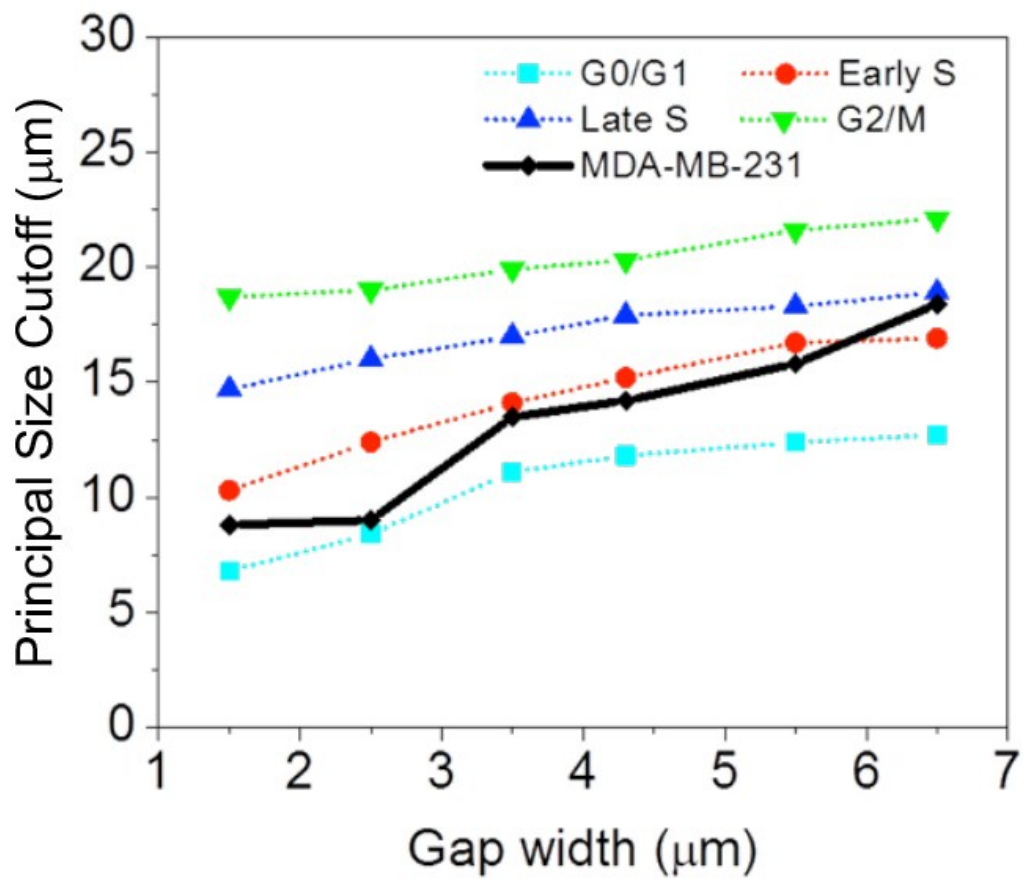

**Supplemental Fig. 3.** PSC function determined from measured cell size distribution and capture efficiency of MDA-MB-231 cells by cell cycle stage with overlaid PSC function for a mixed population of MDA-MB-231.

## Confirmation of Apoptotic Cell Shrinkage

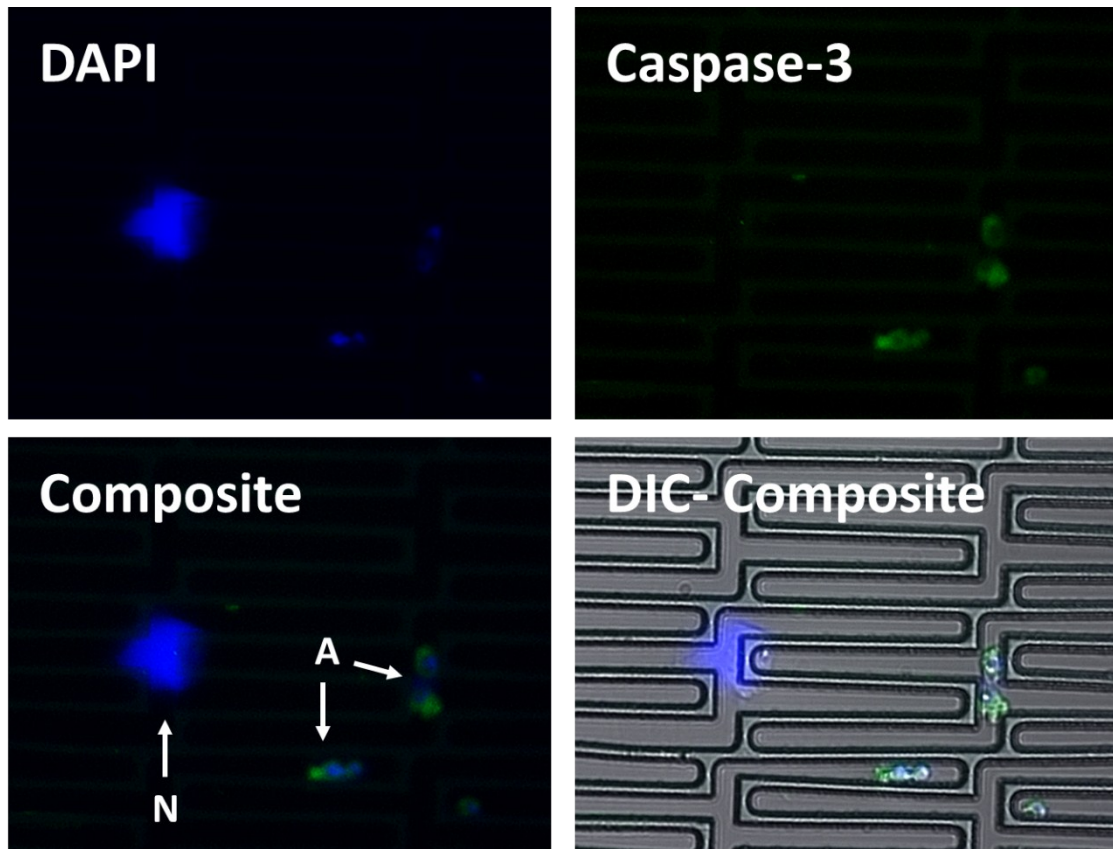

**Supplemental Fig. 4.** Immunocytochemical detection of active caspase-3 (green) in apoptotic cells after prolonged serum starvation. Nuclei are stained with DAPI (blue). Apoptotic cells (A) can be seen to express active caspase-3 while the necrotic cell (N) does not.

## Blood Cell Fractionation

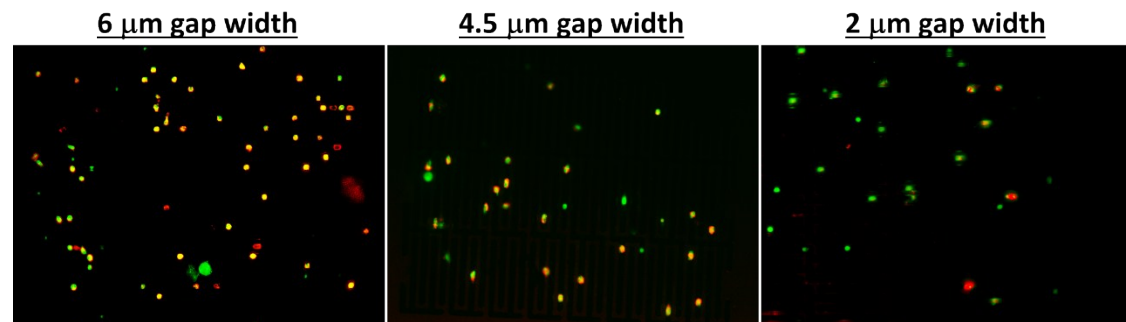

**Supplemental Fig. 5:** Representative images of fractions obtained of granulocytes (red and green) and mononuclear leukocytes (green) in 7, 6 and 4.5 μm tFMSA chambers.

## Supplemental Tables: Quantification Results of tFMSA Fractionation Experiments

### Supplemental Table S1.A

Fig. 3E Polystyrene Spheres

| Gap width ( $\mu\text{m}$ ) | 8 $\mu\text{m}$ counts | 5 $\mu\text{m}$ counts |
|-----------------------------|------------------------|------------------------|
| initial sphere spiked       | 205 $\pm$ 5            | 201 $\pm$ 2            |
| 5.5                         | 20 $\pm$ 2             | 0                      |
| 4.3                         | 180 $\pm$ 12           | 0                      |
| 2.5                         | 0                      | 190 $\pm$ 22           |
| 1.5                         | 0                      | 8 $\pm$ 4              |

Fig. 3F Polystyrene Spheres

| Gap width ( $\mu\text{m}$ ) | 10 $\mu\text{m}$ counts | 3 $\mu\text{m}$ counts |
|-----------------------------|-------------------------|------------------------|
| initial sphere spiked       | 211 $\pm$ 6             | 193 $\pm$ 6            |
| 5.5                         | 198 $\pm$ 21            | 0                      |
| 4.3                         | 4 $\pm$ 2               | 0                      |
| 2.5                         | 0                       | 10 $\pm$ 4             |
| 1.5                         | 0                       | 190 $\pm$ 14           |

### Supplemental Table S1.B

Fig.5B Cancer Cell Lines

| Gap width ( $\mu\text{m}$ ) | C8161 (cell counts) | MDA-MB-231 (cell counts) |
|-----------------------------|---------------------|--------------------------|
| initial cell spiked         | 222 $\pm$ 9         | 272 $\pm$ 11             |
| 7                           | 132 $\pm$ 32        | 44 $\pm$ 12              |
| 6                           | 30 $\pm$ 18         | 31 $\pm$ 12              |
| 4.5                         | 36 $\pm$ 13         | 190 $\pm$ 32             |

### Supplemental Table S1.C

Fig.7A Cell Cycle

| Gap width ( $\mu\text{m}$ ) | G2/M (cell counts) | Early S (cell counts) |
|-----------------------------|--------------------|-----------------------|
| initial cell spiked         | 322 $\pm$ 19       | 332 $\pm$ 15          |
| 6.5                         | 132 $\pm$ 12       | 0                     |

|     |          |          |
|-----|----------|----------|
| 4.5 | 117 ± 28 | 61 ± 11  |
| 2.5 | 45 ± 13  | 234 ± 32 |

Fig.7B Cell Cycle

| Gap width (μm)      | G2/M (cell counts) | G0/G1 (cell counts) |
|---------------------|--------------------|---------------------|
| initial cell spiked | 312 ± 9            | 287 ± 11            |
| 5.5                 | 174 ± 11           | 1 ± 1               |
| 3.5                 | 101 ± 12           | 47 ± 12             |
| 1.5                 | 24 ± 4             | 249 ± 22            |

**Supplemental Table S1.D**

Fig.8E Cell Viability

| Gap width (μm) | Necrotic cells (cell counts) | Apoptotic cells (cell counts) | Viable cells (cell counts) |
|----------------|------------------------------|-------------------------------|----------------------------|
| 5.5            | 176 ± 12                     | 0                             | 50 ± 7                     |
| 3.5            | 20 ± 6                       | 88 ± 21                       | 121 ± 10                   |
| 1.5            | 0                            | 106 ± 15                      | 29 ± 6                     |

**Supplemental Table S1.E**

Fig.9E Blood Cell

| Gap width (μm) | Granulocyte (cell counts) | Mononuclear cells (cell counts) |
|----------------|---------------------------|---------------------------------|
| 6              | 198 ± 21                  | 71 ± 11                         |
| 4.5            | 210 ± 11                  | 45 ± 12                         |
| 2              | 186 ± 44                  | 474 ± 33                        |
